# Supplementary material for: Diagnostic Biomarker KIF23 is Associated With Immune Infiltration in Gastric Cancer
Source: Research Square preprint supplement (doi:10.21203/rs.3.rs-778412/v1), 2021-09-16
Supplement: Supplementary file 1 [file 409aa05afc1ca92577300830.docx]

Supplementary Figure S2. Correlation of KIF23 expression with immune infiltration levels in diverse types of cancer in the TIMER database.


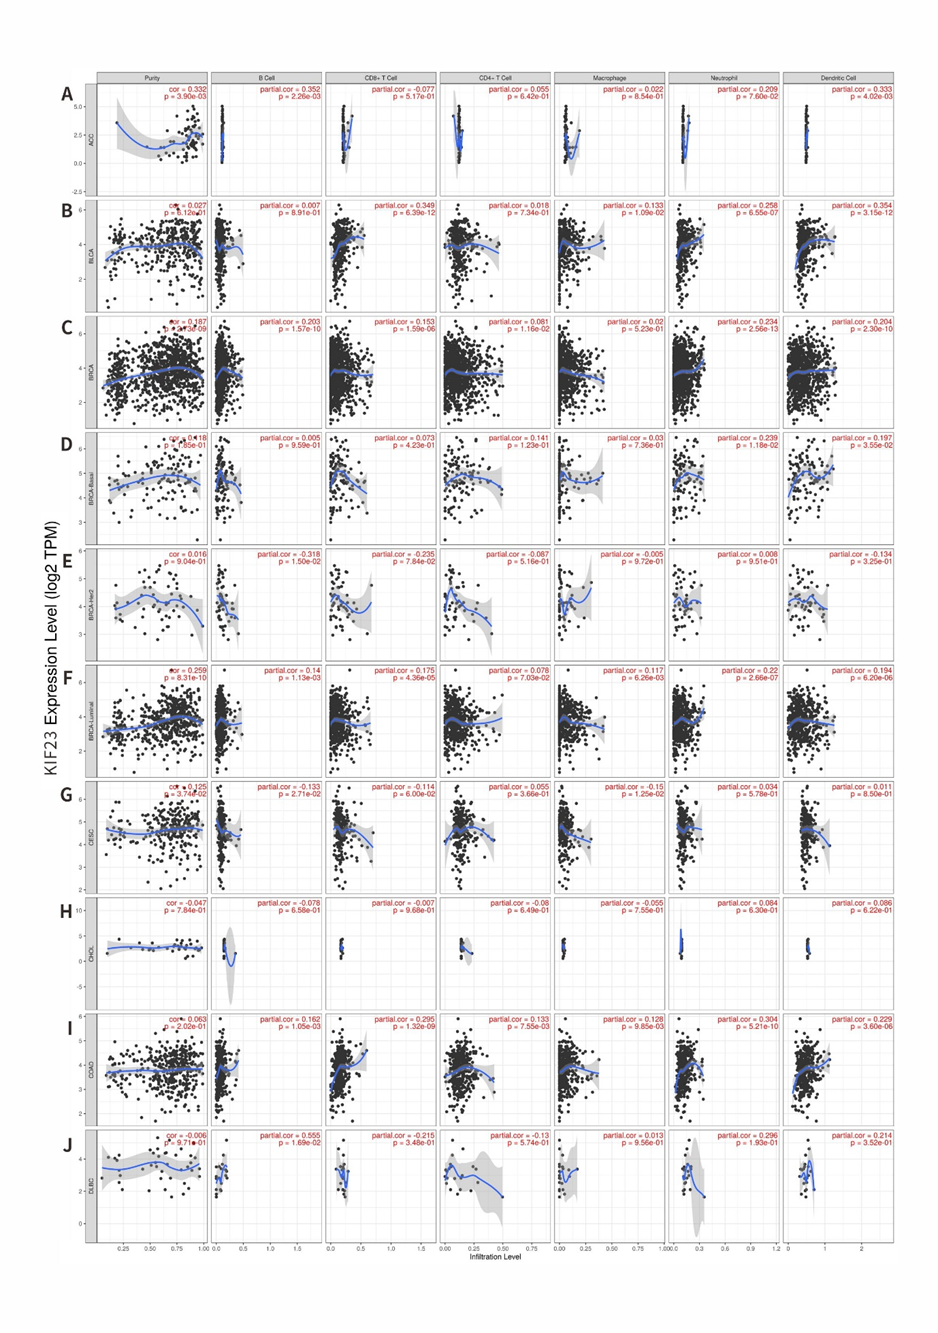


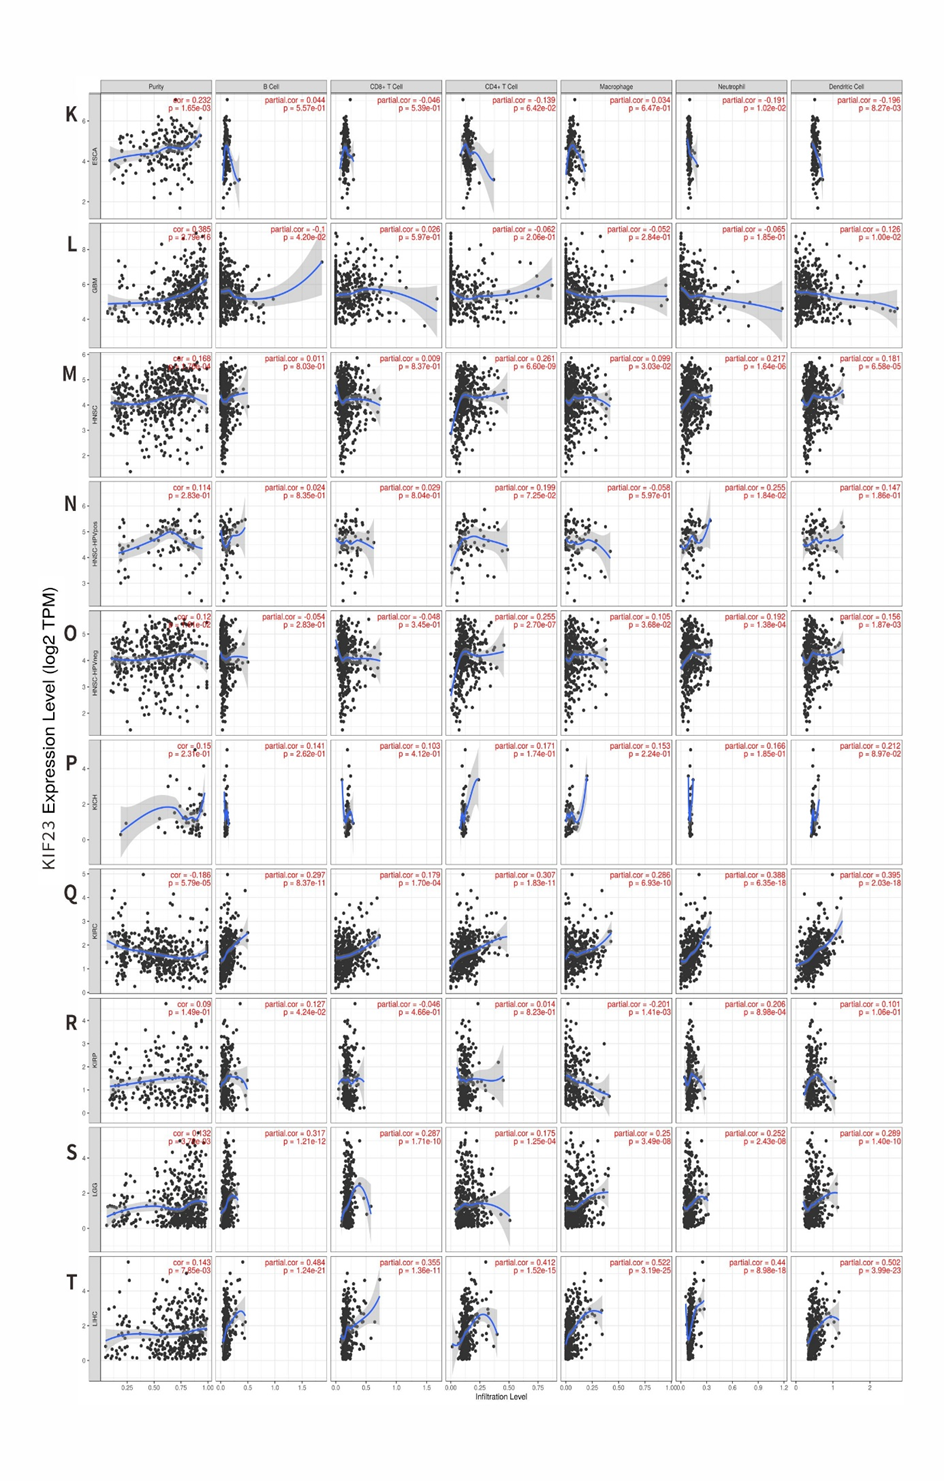


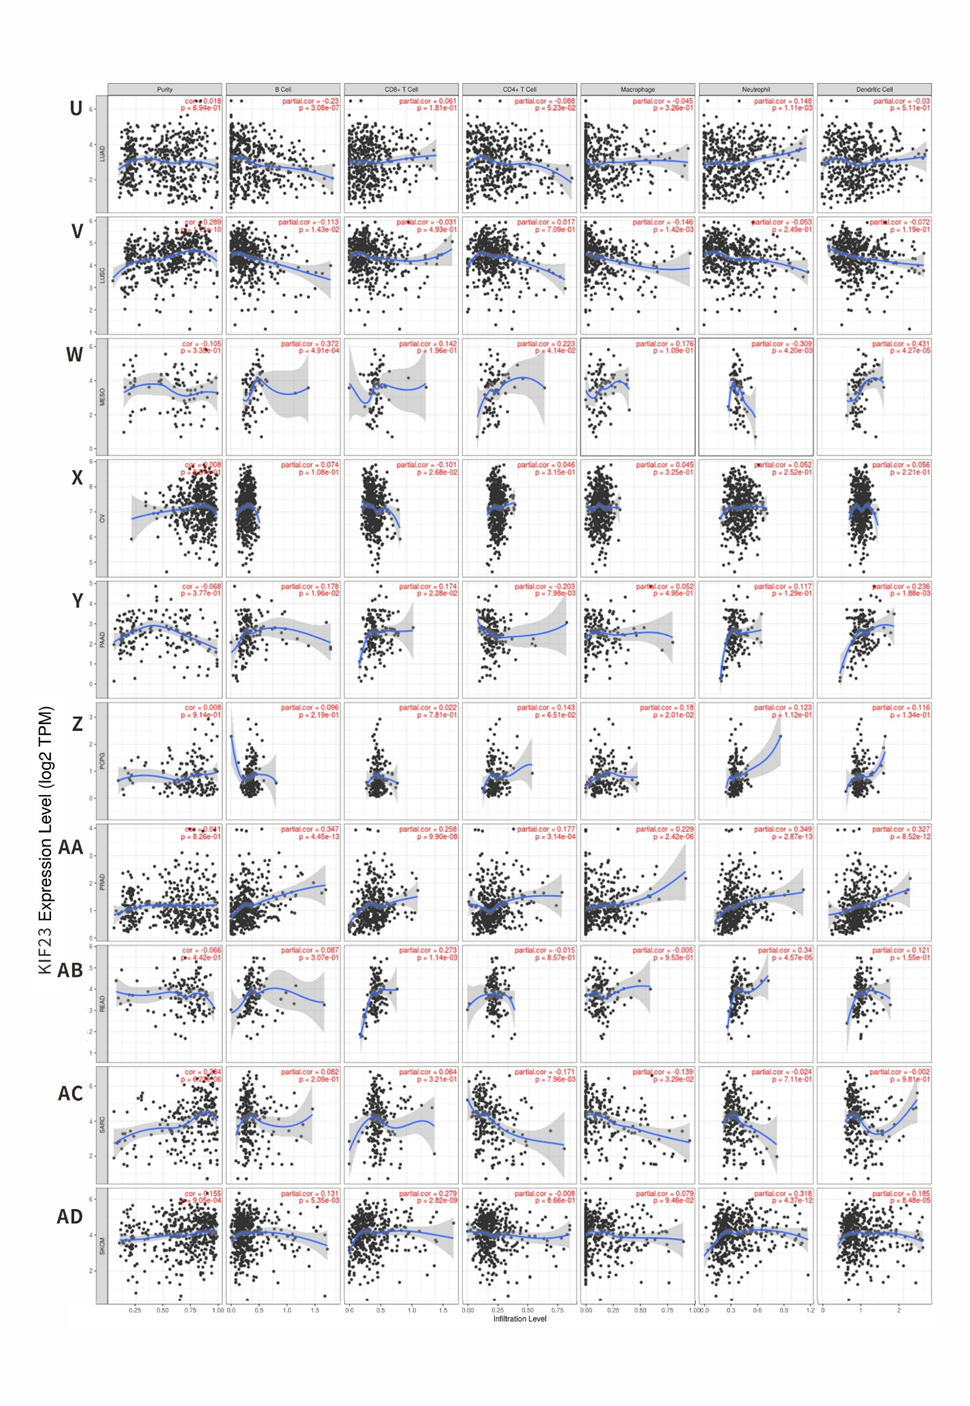


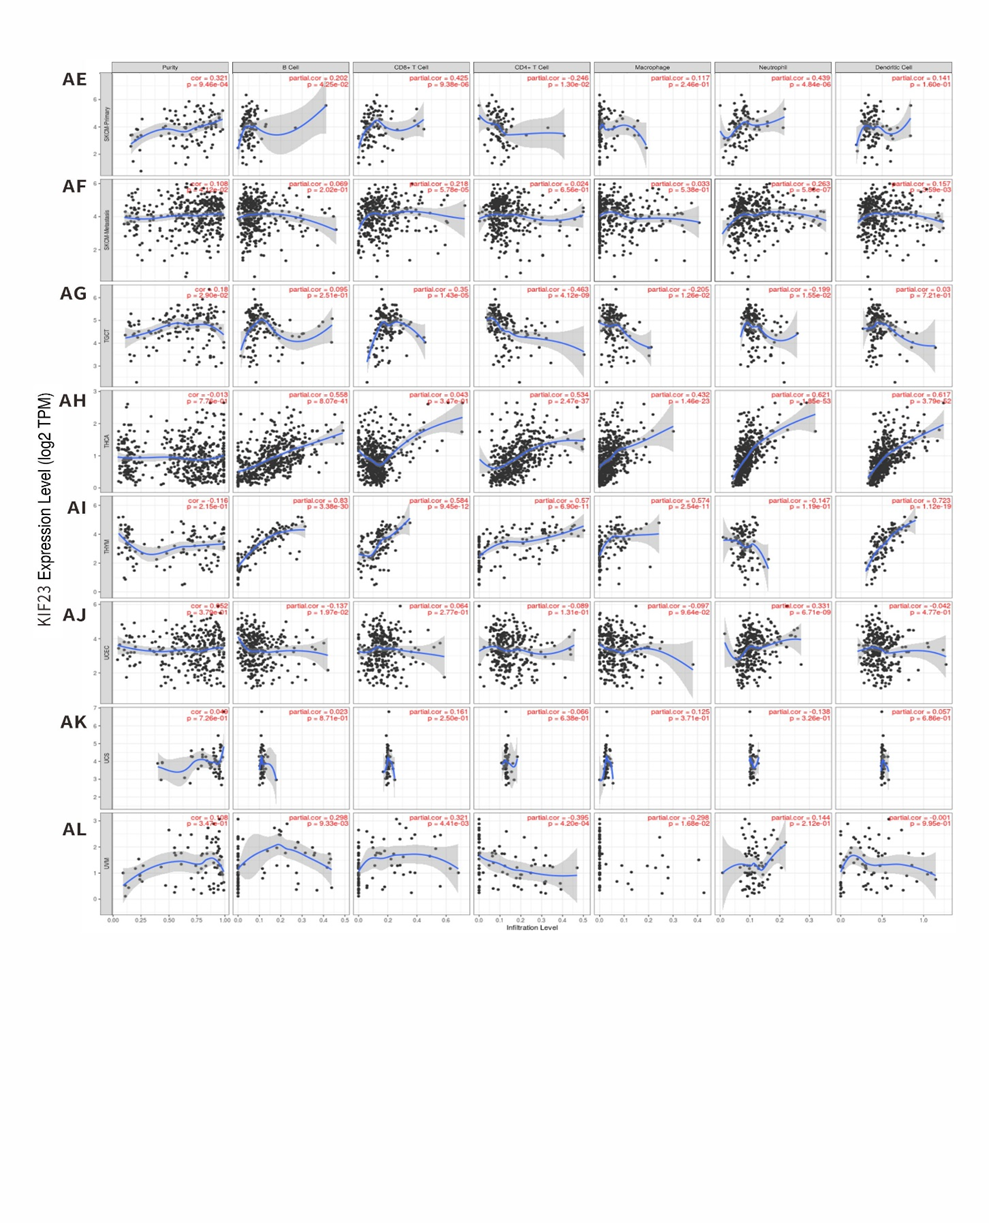


Supplementary Figure S2. Correlation of KIF23 expression with immune infiltration levels in diverse types of cancer in the TIMER database.
